# Supplementary material for: High-resolution structural magnetic resonance examination of the habenula in patients with first-episode depression: an exploratory radiomics diagnostic value analysis based on cluster analysis
Source: Research Square preprint supplement (doi:10.21203/rs.3.rs-6458711/v1), 2025-05-07
Supplement: Supplementary file 1 [file bc02fa2f9f3dd6d083214c19.docx]

**Supplementary results**

**MANOVA:**

**Normalized volume**

Group（F=0.976 ,P=0.325＞0.05）, Gender（F = 0.834,P = 0.362＞0.05, Hemisphere（F = 3.602,P = 0.059＞0.05）, Group * Gende（F = 3.397 ,P = 0.067＞0.05）, Group * Hemisphere（F = 0.107,P = 0.744＞0.05）, Gender * Hemisphere（F = 0.244,P = 0.622＞0.05）, Group * Gender *Hemisphere（F = 0.592,P = 0.443＞0.05）

**T1 value**

Group（F=3.304,P=0.071＞0.05）, Gender（F = 1.509,P = 0.221＞0.05）, Hemisphere（F = 0.041,P = 0.84＞0.05）、Group * Gende, （F = 0.543 ,P = 0.462＞0.05）, Group * Hemisphere（F = 0.095,P = 0.759＞0.05）、Gender * Hemisphere（F = 0.164,P = 0.686＞0.05）, Group * Gender *Hemisphere（F = 0.907,P = 0.342＞0.05）

**Partial correlation analysis:**

**Absolute** **Hb** **volume:**

Absolute total Hb volume: r = -0.234, *p =* 0.126; Absolute right Hb volume: r = -0.202, *p =* 0.187; Absolute left Hb volume: r = -0.233, *p =* 0.129;

**Normalized** **Hb** **volume:**

Normalized total Hb volume: r = -0.221, *p =* 0.148; Normalized right Hb volume: r = -0.192, *p =* 0.213; Normalized left Hb volume: r = -0.218, *p =* 0.155;

**Hb T1 value:**

Total Hb T1 value: r = -0.032, *p =* 0.834; Right Hb T1 value: r = -0.034, *p =* 0.829; Left Hb T1 value: r = -0.2025, *p =* 0.871;
